# Supplementary material
Source: MDPI journal article supplement (https://www.mdpi.com/2071-1050/11/3/649)
Supplement: s1 [file s1]

**Supplement 1.** LDD LU/LC conversion to GLOBIO LU/LC and remaining MSA affected by land use.

| LDD LU/LC class        | GLOBIO LU/LC classes  | MSA <sub>LU</sub><br>(default) | MSA <sub>LU</sub><br>(Nan)* |
|------------------------|-----------------------|--------------------------------|-----------------------------|
| Paddy                  | Intensive agriculture | 0.1                            | 0.1                         |
| Maize                  | Low-input agriculture | 0.3                            | 0.2                         |
| Cash crops             | Low-input agriculture | 0.3                            | 0.2                         |
| Perennial trees        | Agroforestry          | 0.5                            | 0.4                         |
| Evergreen forest       | Primary vegetation    | 1.0                            | 1.0                         |
| Deciduous forest       | Primary vegetation    | 1.0                            | 1.0                         |
| Forest plantation      | Forest plantation     | 0.2                            | 0.3                         |
| Settlement             | Build-up areas        | 0.05                           | 0.05                        |
| Others (miscellaneous) | Man-made pasture      | 0.1                            | 0.2                         |
| Water                  | N/A                   | N/A                            | N/A                         |
| Shifting cultivation   | Man-made pasture      | 0.1                            | 0.2                         |

Note: LDD = Land Development Department; MSA<sub>LU</sub> = Remaining MSA affected by land use management; N/A = Not Applicable; \* derived from similarity index (Sorensen coefficient); MSA<sub>LU</sub> values range from 0 (completely disturbed) to 1 (intact) relative to the pristine stage of a particular LU/LC class

Source: [45]

**Supplement 1.** LDD LU/LC conversion to GLOBIO LU/LC and remaining MSA affected by land use.

| LDD LU/LC class        | GLOBIO LU/LC classes  | MSA <sub>LU</sub><br>(default) | MSA <sub>LU</sub><br>(Nan)* |
|------------------------|-----------------------|--------------------------------|-----------------------------|
| Paddy                  | Intensive agriculture | 0.1                            | 0.1                         |
| Maize                  | Low-input agriculture | 0.3                            | 0.2                         |
| Cash crops             | Low-input agriculture | 0.3                            | 0.2                         |
| Perennial trees        | Agroforestry          | 0.5                            | 0.4                         |
| Evergreen forest       | Primary vegetation    | 1.0                            | 1.0                         |
| Deciduous forest       | Primary vegetation    | 1.0                            | 1.0                         |
| Forest plantation      | Forest plantation     | 0.2                            | 0.3                         |
| Settlement             | Build-up areas        | 0.05                           | 0.05                        |
| Others (miscellaneous) | Man-made pasture      | 0.1                            | 0.2                         |
| Water                  | N/A                   | N/A                            | N/A                         |
| Shifting cultivation   | Man-made pasture      | 0.1                            | 0.2                         |

Note: LDD = Land Development Department; MSA<sub>LU</sub> = Remaining MSA affected by land use management; N/A = Not Applicable; \* derived from similarity index (Sørensen coefficient); MSA<sub>LU</sub> values range from 0 (completely disturbed) to 1 (intact) relative to the pristine stage of a particular LU/LC class

Source: [52]

**Supplement 2.** Fragmentation effect on MSA under varying patch sizes.

| FFQI        | Area (km <sup>2</sup> ) | MSA <sub>F</sub> |
|-------------|-------------------------|------------------|
| < 0.43      | ≤ 1                     | 0.3              |
| 0.43 – 0.58 | ≤10                     | 0.6              |
| 0.58 – 0.90 | ≤100                    | 0.7              |
| 0.90 – 0.98 | ≤1,000                  | 0.9              |
| 0.98 – 0.99 | ≤10,000                 | 0.95             |
| 0.99 – 1    | >10,000                 | 1.0              |

Note: FFQI = fragmented forest quality index; MSA<sub>F</sub> = Remaining MSA affected by habitat fragmentation; MSA<sub>F</sub> values range from 0.3 (severely fragmented) to 1 (contiguous and very large habitat patch).

Source: [52, 60]

**Supplement 3.** Impact of infrastructure on MSA values (MSA<sub>I</sub>).

| Impact Zone   | Tropical forest distance to infrastructure (m) | Temperate forest distance to infrastructure (m) | Grassland & cropland distance to infrastructure (m) | MSA <sub>I</sub> |
|---------------|------------------------------------------------|-------------------------------------------------|-----------------------------------------------------|------------------|
| High impact   | <1000                                          | <300                                            | <500                                                | 0.4              |
| Medium Impact | 1,000-4,000                                    | 300-1,200                                       | 500-2,000                                           | 0.8              |
| Low Impact    | 4,000-14,000                                   | 1,200-4,200                                     | 2,000-7,000                                         | 0.9              |
| No Impact     | >14,000                                        | >4,200                                          | >7,000                                              | 1.0              |

Note: MSA<sub>I</sub> = Remaining MSA affected by habitat fragmentation; MSA<sub>I</sub> values range from 0.4 (nearness to roads or infrastructure development) to 1 (no impact or remoteness).

Source: [52]

Data availability statement: The datasets generated during and/or analyzed during the research are available from the corresponding author (email: [fforyyt@ku.ac.th](mailto:fforyyt@ku.ac.th)) on reasonable request.
